# Supplementary material for: Development and Validation of a Deep Neural Network for Accurate Identification of Endoscopic Images From Patients With Ulcerative Colitis and Crohn's Disease
Source: PubMed Central journal article supplement (PMC8974241; doi:10.3389/fmed.2022.854677), 2022-03-18
Supplement: Data_Sheet_1.pdf [file Data_Sheet_1.pdf]

## Supplemental Tables

**Supplement Table 1 Results of Six-fold cross-validation on the training dataset (Repeat five times)**

|                    | Accuracy(95%CI)    |               | Sensitivity(95%CI) | Specificity(95%CI) | PPV (95%CI)        | NPV (95%CI)        | AUC (95%CI)        |
|--------------------|--------------------|---------------|--------------------|--------------------|--------------------|--------------------|--------------------|
| <b>Per patient</b> | 0.962(0.951-0.971) | <b>Normal</b> | 0.989(0.969-0.996) | 0.999(0.995-1.000) | 0.996(0.980-0.999) | 0.997(0.992-0.999) | 1.000(0.998-1.000) |
|                    |                    | <b>UC</b>     | 0.959(0.940-0.972) | 0.970(0.956-0.980) | 0.961(0.942-0.974) | 0.969(0.954-0.979) | 0.988(0.982-0.995) |
|                    |                    | <b>CD</b>     | 0.972(0.953-0.983) | 0.964(0.950-0.975) | 0.939(0.915-0.957) | 0.984(0.973-0.990) | 0.988(0.981-0.995) |
| <b>Per lesion</b>  | 0.916(0.913-0.920) | <b>Normal</b> | 0.985(0.983-0.987) | 0.987(0.985-0.989) | 0.978(0.975-0.981) | 0.991(0.990-0.993) | 0.999(0.999-0.999) |
|                    |                    | <b>UC</b>     | 0.903(0.897-0.909) | 0.922(0.918-0.925) | 0.842(0.835-0.849) | 0.954(0.951-0.957) | 0.974(0.971-0.976) |
|                    |                    | <b>CD</b>     | 0.935(0.929-0.939) | 0.912(0.908-0.916) | 0.832(0.825-0.839) | 0.968(0.965-0.970) | 0.977(0.975-0.980) |

PPV, positive predictive value; NPV, negative predictive value; AUC, area under the receiver operating characteristic curve.

**Supplement Table 2 Results of multicentre verification achieved by deep model**

| Hospital                                                                     |                    | Accuracy(95%CI)    |               | Sensitivity(95%CI) | Specificity(95%CI) | PPV (95%CI)        | NPV (95%CI)        |
|------------------------------------------------------------------------------|--------------------|--------------------|---------------|--------------------|--------------------|--------------------|--------------------|
| <b>The First Affiliated<br/>Hospital of Chongqing<br/>Medical University</b> | <b>Per lesion</b>  | 0.864(0.841-0.884) | <b>Normal</b> | 0.950(0.920-0.969) | 0.914(0.890-0.934) | 0.848(0.807-0.882) | 0.973(0.957-0.983) |
|                                                                              |                    |                    | <b>UC</b>     | 0.884(0.843-0.916) | 0.899(0.874-0.920) | 0.798(0.751-0.838) | 0.945(0.925-0.961) |
|                                                                              |                    |                    | <b>CD</b>     | 0.926(0.892-0.949) | 0.897(0.870-0.919) | 0.832(0.790-0.866) | 0.956(0.936-0.970) |
|                                                                              | <b>Per patient</b> | 0.951(0.880-0.981) | <b>Normal</b> | 1.000(0.875-1.000) | 1.000(0.934-1.000) | 1.000(0.875-1.000) | 1.000(0.934-1.000) |
|                                                                              |                    |                    | <b>UC</b>     | 0.963(0.817-0.993) | 0.963(0.875-0.990) | 0.929(0.774-0.980) | 0.981(0.901-0.997) |
|                                                                              |                    |                    | <b>CD</b>     | 0.926(0.766-0.979) | 0.981(0.902-0.997) | 0.962(0.811-0.993) | 0.964(0.877-0.990) |
| <b>The Sixth Affiliated<br/>Hospital of Sun Yat-<br/>sen University</b>      | <b>Per lesion</b>  | 0.842(0.805-0.873) | <b>Normal</b> | 0.957(0.909-0.980) | 0.916(0.879-0.943) | 0.842(0.777-0.890) | 0.978(0.954-0.990) |
|                                                                              |                    |                    | <b>UC</b>     | 0.897(0.840-0.936) | 0.875(0.832-0.909) | 0.800(0.735-0.853) | 0.939(0.903-0.962) |
|                                                                              |                    |                    | <b>CD</b>     | 0.887(0.825-0.929) | 0.922(0.886-0.947) | 0.846(0.779-0.895) | 0.944(0.912-0.966) |
|                                                                              | <b>Per patient</b> | 0.942(0.871-0.975) | <b>Normal</b> | 1.000(0.871-1.000) | 0.967(0.886-0.991) | 0.929(0.774-0.980) | 1.000(0.938-1.000) |
|                                                                              |                    |                    | <b>UC</b>     | 0.967(0.833-0.994) | 0.964(0.879-0.990) | 0.935(0.793-0.982) | 0.982(0.904-0.997) |
|                                                                              |                    |                    | <b>CD</b>     | 0.967(0.833-0.994) | 0.964(0.879-0.990) | 0.935(0.793-0.982) | 0.982(0.904-0.997) |
| <b>Tongji Hospital</b>                                                       | <b>Per lesion</b>  | 0.814(0.776-0.848) | <b>Normal</b> | 0.956(0.921-0.976) | 0.963(0.929-0.981) | 0.965(0.932-0.982) | 0.955(0.918-0.975) |
|                                                                              |                    |                    | <b>UC</b>     | 0.991(0.949-0.998) | 0.938(0.907-0.959) | 0.835(0.760-0.889) | 0.997(0.983-0.999) |
|                                                                              |                    |                    | <b>CD</b>     | 0.910(0.842-0.950) | 0.881(0.842-0.911) | 0.716(0.637-0.784) | 0.967(0.941-0.982) |
|                                                                              | <b>Per patient</b> | 0.897(0.736-0.964) | <b>Normal</b> | 1.000(0.701-1.000) | 0.950(0.764-0.991) | 0.900(0.596-0.982) | 1.000(0.832-1.000) |
|                                                                              |                    |                    | <b>UC</b>     | 1.000(0.723-1.000) | 1.000(0.832-1.000) | 1.000(0.723-1.000) | 1.000(0.832-1.000) |
|                                                                              |                    |                    | <b>CD</b>     | 1.000(0.723-1.000) | 0.947(0.754-0.991) | 0.909(0.623-0.984) | 1.000(0.824-1.000) |

PPV, positive predictive value; NPV, negative predictive value.
